# Supplementary material for: EBF1 primes B-lymphoid enhancers and limits the myeloid bias in murine multipotent progenitors
Source: PubMed Central journal article supplement (PMC9437269; doi:10.1084/jem.20212437), 2022-09-01

Figure 1C

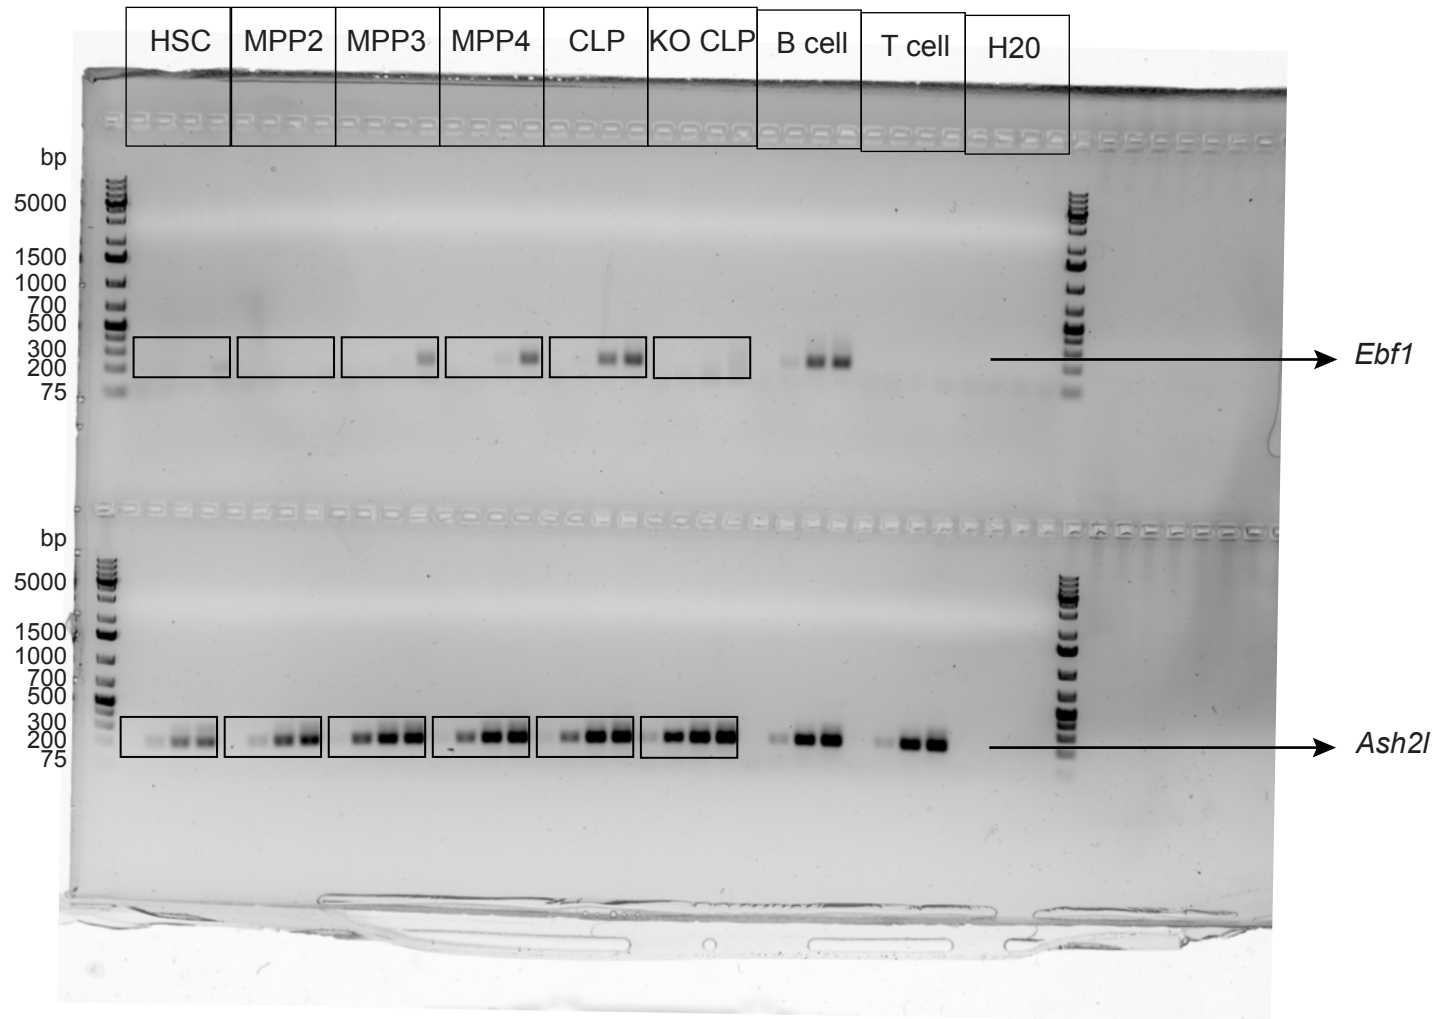

Figure 1D

MPP4  
MPP3  
MPP2  
HSC  
CLP  
FrA  
B cell  
KO FrA  
T cell

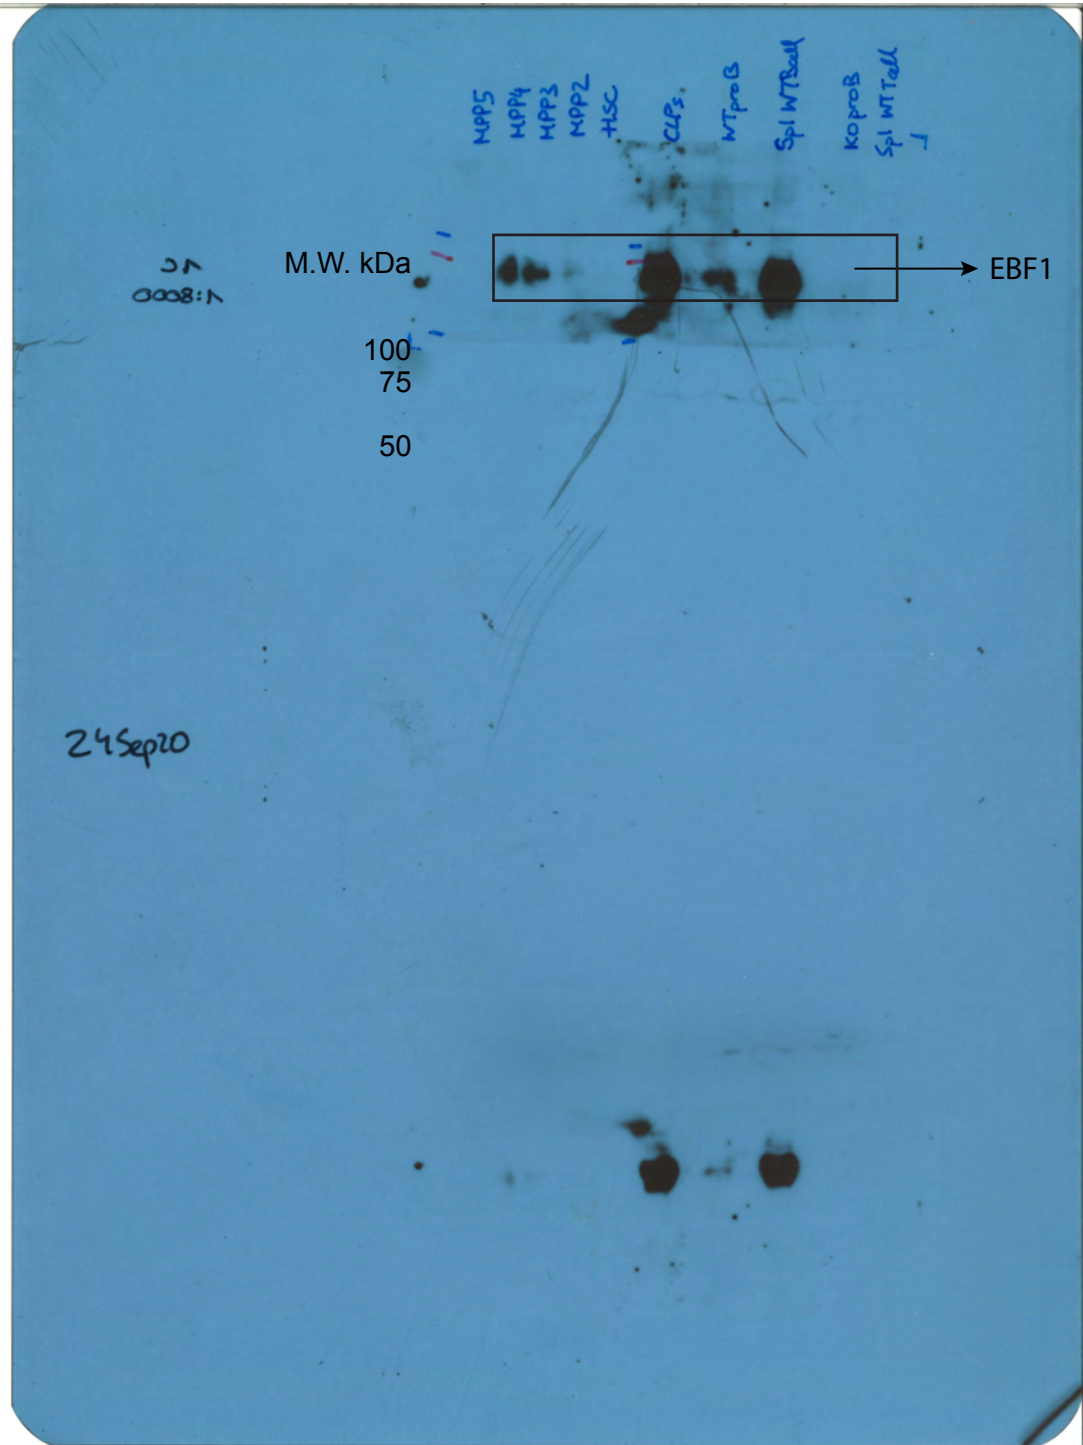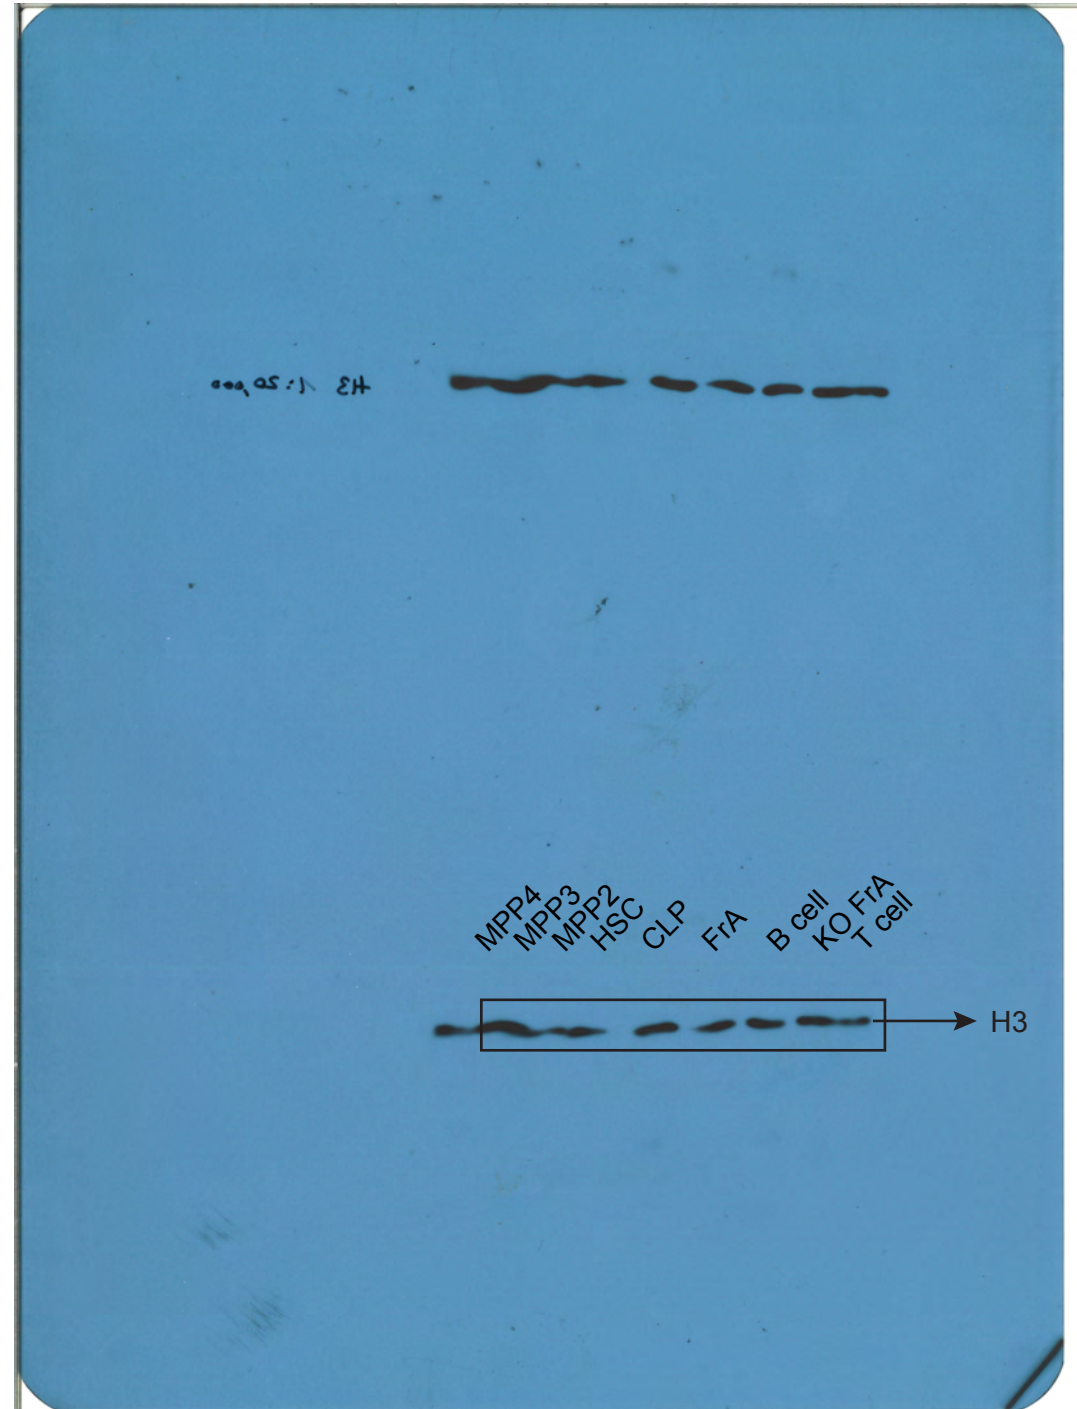

Supplement: JEM_20212437_SourceDataF1.pdf [file JEM_20212437_SourceDataF1.pdf]
