# Supplementary material for: EBF1 primes B-lymphoid enhancers and limits the myeloid bias in murine multipotent progenitors
Source: PubMed Central journal article supplement (PMC9437269; doi:10.1084/jem.20212437), 2022-09-01
Supplement: JEM_20212437_SourceDataFS2.pdf [file JEM_20212437_SourceDataFS2.pdf]

Figure S2C

Exposure merged with ladder

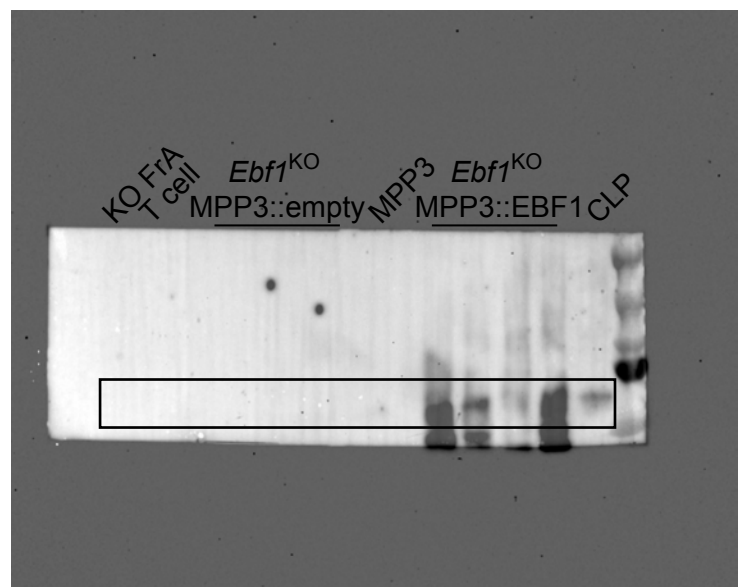

M.W. kDa  
250  
150  
100  
75  
50

Exposure

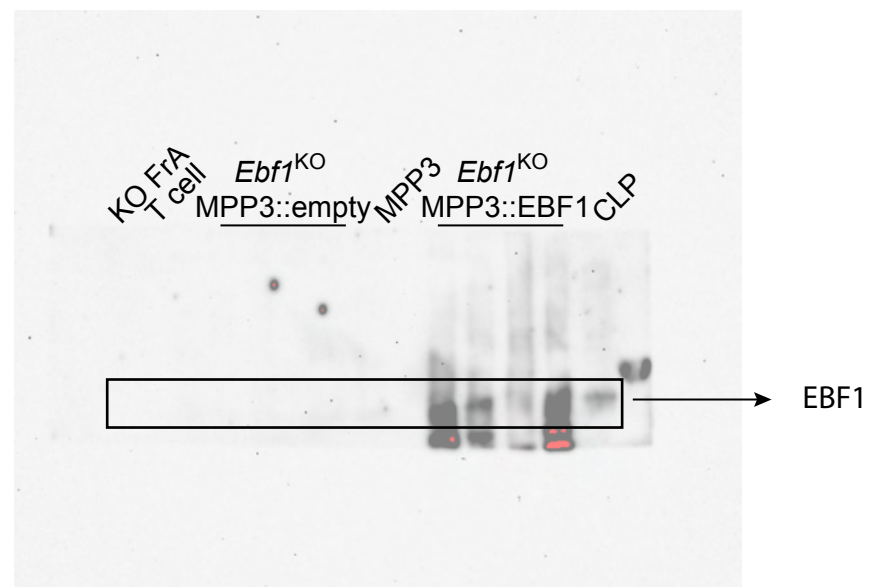

EBF1

KO F1A T cell *Ebf1*<sup>KO</sup> MPP3::empty MPP3::EBF1 CLP

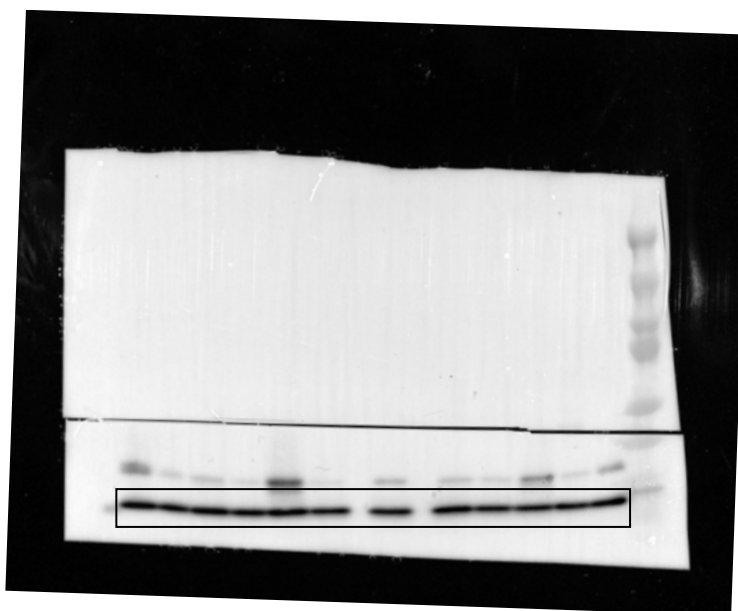

M.W. kDa  
250  
150  
100  
75  
50  
37  
20

KO F1A T cell *Ebf1*<sup>KO</sup> MPP3::empty MPP3::EBF1 CLP

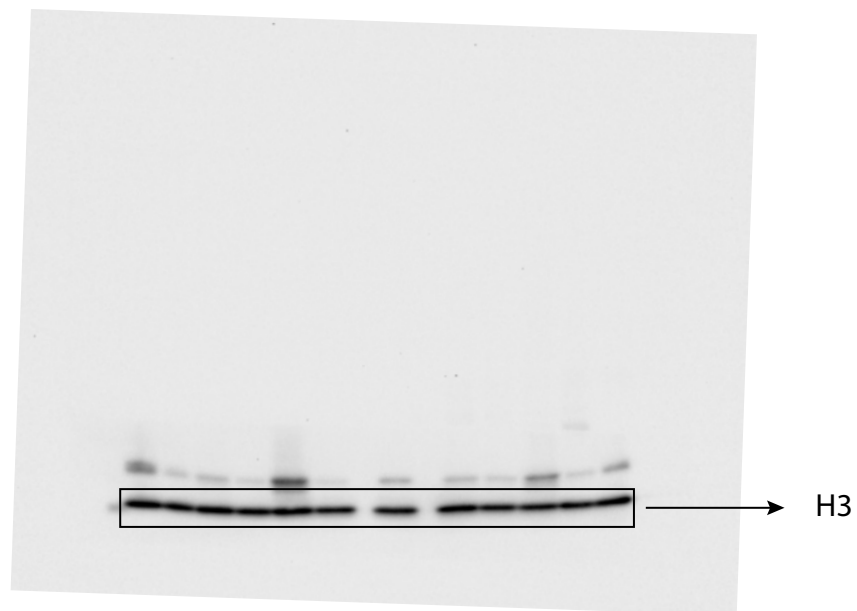

H3
